# Supplementary material
Source: PubMed Central journal article supplement (PMC7190390)
Supplement: 10-1055-s-0040-1709506-s190234ra.pdf [file 10-1055-s-0040-1709506-s190234ra.pdf]

**Supplementary Appendix Table S1** CDT codes (code on dental procedures and nomenclature) used to generate the study data consisting of posterior composite restorations and root canal treatments

| Treatment type                   | CDT codes | Procedure description                                 |
|----------------------------------|-----------|-------------------------------------------------------|
| Posterior composite restorations | 2385      | Resin one surface, posterior permanent                |
|                                  | 2386      | Resin two surface, posterior permanent                |
|                                  | 2387      | Resin three surfaces, posterior permanent             |
|                                  | 2388      | Resin four or more surface, posterior permanent       |
|                                  | 2391      | Resin-based composite, one surface posterior          |
|                                  | 2392      | Resin-based composite, two surfaces posterior         |
|                                  | 2393      | Resin-based composite, three surfaces posterior       |
| Root canal treatments            | 2394      | Resin-based composite, four or more surface posterior |
|                                  | 3310      | Root canal therapy: anterior                          |
|                                  | 3320      | Root canal therapy: bicuspid                          |
|                                  | 3330      | Root canal therapy: molar                             |

**Supplementary Appendix Table S2** Showing incorrect instances of a tooth number field and their frequencies for PCR

| Incorrect tooth number field | Frequency |
|------------------------------|-----------|
| Missing tooth number         | 26        |
| A                            | 8,532     |
| B                            | 6,088     |
| C                            | 183       |
| D                            | 57        |
| E                            | 97        |
| F                            | 91        |
| G                            | 56        |
| H                            | 194       |
| I                            | 5,989     |
| J                            | 8,295     |
| K                            | 8,472     |
| L                            | 6,704     |
| M                            | 127       |
| N                            | 4         |
| O                            | 17        |
| P                            | 6         |
| Q                            | 6         |
| R                            | 128       |

(Continued)

**Supplementary Appendix Table S2** (Continued)

| Incorrect tooth number field | Frequency |
|------------------------------|-----------|
| S                            | 6,851     |
| T                            | 8,539     |
| FM                           | 1         |
| LA                           | 3         |
| 33                           | 2,492     |
| 34                           | 1,609     |
| 35                           | 26        |
| 36                           | 2         |
| 37                           | 3         |
| 38                           | 6         |
| 39                           | 4         |
| 40                           | 27        |
| 41                           | 1,530     |
| 42                           | 2,480     |
| 43                           | 2,635     |
| 44                           | 1,584     |
| 45                           | 23        |
| 47                           | 3         |
| 48                           | 1         |
| 49                           | 3         |
| 50                           | 14        |
| 51                           | 1,654     |
| 52                           | 2,664     |
| 67                           | 2         |
| Total                        | 77,228    |

Abbreviation: PCR, posterior composite restorations.

**Supplementary Appendix Table S3** Incorrect tooth numbers for RCT

| Tooth numbers        | Frequency |
|----------------------|-----------|
| Missing tooth number | 284       |
| B                    | 1         |
| E                    | 1         |
| F                    | 1         |
| K                    | 1         |
| O                    | 1         |
| T                    | 1         |
| 33                   | 1         |
| 34                   | 1         |
| 36                   | 1         |
| 42                   | 3         |
| 43                   | 2         |
| 44                   | 1         |
| 51                   | 3         |
| 52                   | 4         |
| 0–11                 | 3         |
| 0–13                 | 1         |
| 0–20                 | 3         |
| 0–22                 | 1         |
| 0–24                 | 2         |
| 0–29                 | 1         |
| 0–7                  | 2         |
| 0–8                  | 3         |
| 0–9                  | 2         |
| Total                | 324       |

Abbreviation: RCT, root canal treatment.

**Supplementary Appendix Table S5** Variations of PCR and RCT CDT codes which were found and excluded in the data by the number of observations and patients

| PCR codes |                   |                    |
|-----------|-------------------|--------------------|
| CDT codes | Observations/Rows | Number of patients |
| 2385C     | 9                 | 8                  |
| 2386C     | 9                 | 7                  |
| 2387C     | 3                 | 3                  |
| 2391A     | 44                | 34                 |
| 2391B     | 418               | 237                |
| 2392A     | 7                 | 5                  |
| 2392B     | 233               | 177                |
| RCT codes |                   |                    |
| CDT codes | Observations/Rows | Number of patients |
| 3310D     | 4                 | 4                  |
| 3320D     | 18                | 15                 |
| 3330d     | 53                | 49                 |

Abbreviations: CDT, code on dental procedures and nomenclature; PCR, posterior composite restorations; RCT, root canal treatment.

**Supplementary Appendix Table S4** Original and revised documentation of root canal treatment (RCT) after correcting the procedure codes according to tooth type

| RCT codes                     | Tooth type |        |          |        |        |
|-------------------------------|------------|--------|----------|--------|--------|
|                               | Incisor    | Canine | Premolar | Molar  | Total  |
| Original documentation of RCT |            |        |          |        |        |
| Anterior RCT (3310)           | 9,570      | 4,575  | 488      | 84     | 14,717 |
| Bicuspid RCT (3320)           | 67         | 81     | 23,465   | 70     | 23,683 |
| Molar RCT (3330)              | 11         | 5      | 143      | 34,043 | 34,202 |
| Total                         | 9,648      | 4,661  | 24,096   | 34,197 | 72,602 |
| Revised documentation of RCT  |            |        |          |        |        |
| Anterior RCT (3310)           | 9,648      | 4,661  | 0        | 0      | 14,309 |
| Bicuspid RCT (3320)           | 0          | 0      | 24,096   | 0      | 24,096 |
| Molar RCT (3330)              | 0          | 0      | 0        | 34,197 | 34,197 |
| Total                         | 9,648      | 4,661  | 24,096   | 34,197 | 72,602 |

**Supplementary Appendix Table S6** Number of patients who received one or more posterior composite restorations (PCR) and/or root canal treatment (RCT)

| Patients who received PCR              |                 |                |                 |
|----------------------------------------|-----------------|----------------|-----------------|
| Age in years                           | Gender          |                | Total (%)       |
|                                        | Female (%)      | Male (%)       |                 |
| Less than 18                           | 20,535 (21.2)   | 18,484 (24.8)  | 39,019 (22.8)   |
| 18–44                                  | 46,713 (48.3)   | 33,040 (44.3)  | 79,753 (46.6)   |
| 45–64                                  | 22,506 (23.3)   | 17,447 (23.4)  | 39,953 (23.3)   |
| 65 or older                            | 6,894 (7.1)     | 5,568 (7.5)    | 12,462 (7.3)    |
| Total                                  | 96,648 (100.0)  | 74,539 (100.0) | 171,187 (100.0) |
| Patients who received RCT              |                 |                |                 |
| Less than 18                           | 288 (3.7)       | 279 (4.1)      | 567 (3.9)       |
| 18–44                                  | 3,782 (48.4)    | 3,220 (47.0)   | 7,002 (47.7)    |
| 45–64                                  | 2,883 (36.9)    | 2,521 (36.8)   | 5,404 (36.8)    |
| 65 or older                            | 865 (11.1)      | 837 (12.2)     | 1,702 (11.6)    |
| Total                                  | 7,818 (100.0)   | 6,857 (100.0)  | 14,675 (100.0)  |
| Patients who received both PCR and RCT |                 |                |                 |
| Less than 18                           | 1,072 (6.0)     | 1,001 (7.1)    | 2,073 (6.5)     |
| 18–44                                  | 8,207 (45.6)    | 5,509 (39.3)   | 13,716 (42.8)   |
| 45–64                                  | 6,951 (38.6)    | 5,746 (41.0)   | 12,697 (39.6)   |
| 65 or older                            | 1,771 (9.8)     | 1,768 (12.6)   | 3,539 (11.1)    |
| Total                                  | 18,001 (100.0)  | 14,024 (100.0) | 32,025 (100.0)  |
| Sum total                              | 122,467 (56.20) | 95,420 (43.80) | 217,887(100.0)  |

**Supplementary Appendix Table S7** Frequency of PCR and RCT procedures by tooth and arch

| Procedures                      | Tooth type | Maxillary       | Mandibular      | Total           |
|---------------------------------|------------|-----------------|-----------------|-----------------|
| Root canal treatment            | Anterior   | 10,721 (75.82)  | 3,419 (24.18)   | 14,140 (19.84)  |
|                                 | Bicuspid   | 14,077 (59.38)  | 9,630 (40.62)   | 23,707 (33.27)  |
|                                 | Molar      | 14,318 (42.85)  | 19,093 (57.15)  | 33,411 (46.89)  |
|                                 | Total      | 39,116 (54.89)  | 32,142 (45.11)  | 71,258 (100)    |
| Posterior composite restoration | Premolar   | 153,152 (54.83) | 126,161 (45.17) | 279,313 (33.69) |
|                                 | Molar      | 264,599 (48.13) | 285,205 (51.87) | 549,804 (66.31) |
|                                 | Total      | 417,751 (50.39) | 411,366 (49.61) | 829,117 (100)   |

Abbreviations: PCR, posterior composite restorations; RCT, root canal treatment.
